# Supplementary material
Source: HighWire-hosted journal article supplement (https://bmjopen.bmj.com/content/14/11/e092590)

C) Brochure 3. Malaria sampling strategies.

Boletim Nº 2  
Junho  
2022

### Vigilância genómica da malária em Moçambique

**Definir estratégias de amostragem para vigilância da malária**

A integração de dados genómicos em actividades de vigilância de rotina tem o potencial de aumentar a inteligência accionável do PNCM na tomada de decisões programáticas sobre a melhor combinação de medidas de controlo e eliminação. Para a obtenção de métricas adequadas nos estudos de vigilância molecular da malária e o seu correto uso para resolver os casos de estudo (ver o boletim número 2) é premente o desenvolvimento de estratégias de amostragem adequadas e este é um dos objectivos do projecto GenMoz.

#### Estratégias e objectivos

#### Recrutamento dos participantes

| ESTRATÉGIA         | RECRUTAMENTO DE                                                         | POPULAÇÃO ALVO                                                    | RECRUTADOR         |
|--------------------|-------------------------------------------------------------------------|-------------------------------------------------------------------|--------------------|
| Densa              | Todos casos clínicos nas unidades sanitárias (US) e na comunidade       | Todas idades<br>Zona de quase eliminação                          | Tec. de saúde, APE |
| Dirigida           | Todos casos clínicos nas US<br>Uso de TOR, pLDH e pHRP2*                | Crianças dos 2-10 anos<br>Zona de transmissão média à alta        | Tec. de saúde      |
| Consulta pré-natal | Todas mulheres grávidas que atendem a primeira consulta prenatal nas US | Mulheres grávidas >12<br>Zona de transmissão baixa à média à alta | Tec. de saúde      |
| Intervenções       | Todos casos clínicos nas US, antes e depois da intervenção              | Crianças dos 2-10 anos<br>Zona de transmissão média à alta        | Tec. de saúde      |

\* Administrar os dois testes (TOR, pHRP2 e pLDH) aos participantes após consentimento informado e escrito, para a detecção de doenças no gene *pfpr37*, do *P. falciparum*, em amostras de sangue de transmissão, na região africana.

- Procedimento operacional padrão
- Procedimentos específicos
- Garantia do respeito à privacidade, da confidencialidade e da proteção dos dados do participante
- Garantia do rastreio e da qualidade das amostras armazenadas na US e CISM

**Plano de Monitoria e controlo de qualidade do recrutamento**

- Qualidade e quantidade da amostra colhida
- Verificação cruzada de dados da amostra vs. questionário, consentimento
- Número total de documentos corresponde ao número total de amostras colhidas
- Número de documentos não conformes
- Quantidade de amostras com não-conformidade

Área de estudo

Tamanho de amostra (amostragem dirigida e CPN)

O tamanho da amostra por sítio de amostragem (provincia) foi estimado considerando o número resistência antimalária e de diagnóstico como caso de estudo primário em Moçambique estabelecendo 5% de resistências como um limite de aviso (%). Assumindo perda de 10% das amostras ou uma análise não interpretável, um tamanho de amostra de 400 por provincia seria adequado.

Consentimento

Questionário

Folha de requisição

1. World Health Organization (2020). Master protocol for surveillance of pfpr37/3 deletions and biobanking to support future research. Geneva

D) Brochure 4. Generation of genomic data in the laboratory.

Boletim Nº 4  
Outubro  
2022

### Vigilância genómica da malária em Moçambique

**Geração de dados genómicos no laboratório**

O presente boletim descreve a implementação do Sequenciamento de Nova-geração (NGS, do inglês Next Generation Sequencing) para a vigilância genómica do *Plasmodium falciparum* em Moçambique, estabelecida no Laboratório de Biologia Molecular do Centro de Investigação em Saúde de Manhiça (CISM).

As plataformas de NGS permitem a geração rápida de dados sequenciando grandes quantidades de DNA em paralelo mediante o uso de diversas tecnologias (1). O princípio básico da técnica consiste na fragmentação do DNA seguida da sequenciação múltipla de cada base do genoma do parasita (completo ou parcial), o que permite maior acurácia dos dados gerados e uma visão sobre a variação do DNA (1).

#### Processo de geração de dados genómicos

O processo de geração de dados genómicos no laboratório consiste em quatro etapas principais (Fig. 1): (i) recepção de amostras no laboratório, (ii) extração de DNA, quantificação da parasitemia e biobanco, (iii) preparação de bibliotecas e sequenciação no MSeq de Illumina e (iv) análise de dados.

A análise inicial fornece informação acerca da qualidade da corrida e das amostras processadas. Porque o NGS produz grandes quantidades de sequências, na concepção da sua infraestrutura laboratorial também deve ser considerada tanto a capacidade de armazenamento de dados assim como um computador de alto rendimento para análise bioinformática de dados massivos.

Figura 1: Processo de geração de dados genómicos

Partilha de dados com o PNCM e uso para acções programáticas

1. Frost, R. (2016). Next-Generation Sequencing: General Information about the Technology, Applications and Limitations. Clinical Applications for Next-Generation Sequencing. 1-18. doi:10.1016/b978-0-12-801739-5.00002-3.

A infraestrutura laboratorial

A infraestrutura laboratorial está baseada no CISM e apresenta um fluxograma unidireccional composto basicamente de duas componentes com o objectivo principal de evitar contaminações: (A) a pré-PCR e (B) a pós-PCR como ilustrado no esquema abaixo.

A Recepção de amostras

B Sala de amplificação

Sala de extração

Sala de preparação de bibliotecas e controle de qualidade

Biobanco

Sala de sequenciamento

Sala de mistura de reagentes

Infraestrutura computacional

O ensaio molecular

Genoma de *P. falciparum*

Multiplex PCR  
Amplificação de cada locus alvo

Indexing PCR  
Marcação exclusiva de amplicons em uma amostra individual

Levagens  
Purificação magnética de fragmentos de DNA

Sequenciamento  
Mistura de amostras e carregamento no MSeq para sequenciamento



E) Brochure 5. Bioinformatic analysis of genomic data.

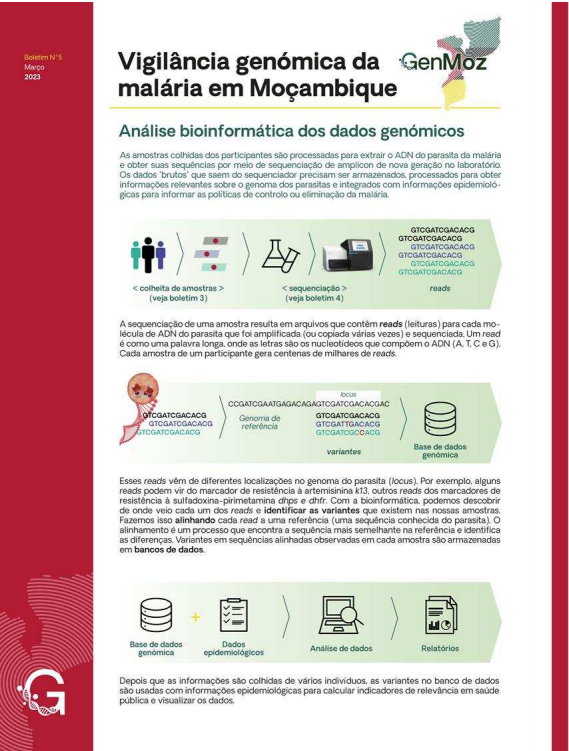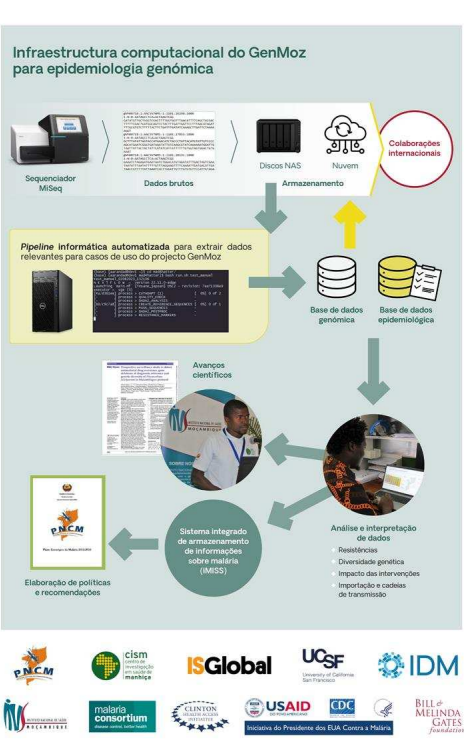

G) Brochure 7. Use of genetic information to identify the origin of infections.

Sistema N° 7  
Outubro  
2023

## Vigilância genómica da malária em Moçambique

### Uso da informação genética para identificar a origem das infecções

Com as ferramentas moleculares estabelecidas em GenMoz obtemos as características genéticas de cada infecção por parasitas *Plasmodium falciparum*. A comparação dessas características entre os diferentes parasitas presentes em uma população humana ou área geográfica ajuda para compreender a dinâmica e os fluxos da transmissão, importante para o controle e eliminação da malária.

### Utilização prática da relação genética entre parasitas

O grau de parentesco entre parasitas é chamado 'semelhança genética' (em inglês, *genetic relatedness*) e permite construir uma cadeia de transmissão da malária. Esta informação é usada para:

- 1) Classificar os casos de malária local ou importada de outras regiões e
- 2) Identificar as principais fontes (regiões geográficas) que sustentam a transmissão, a fim de gerar informações úteis para tomada de decisões programáticas para o controle da malária.

Amostragem densa  
Baixa transmissão

Amostragem esparsa  
Alta transmissão

Figura 2. Estratégia de amostragem

### GenMoz

Como medimos a semelhança genética entre parasitas em diferentes amostras?

Os dados genómicos gerados a nível do laboratório são analisados com ferramentas bioinformáticas para calcular métricas de semelhança como a identidade por descendência (IBD - *identity-by-descent*). O IBD descreve a percentagem de genoma que é igual entre parasitas devido a uma ancestralidade comum (Figura 1).

Figura 1. Exemplo de informação genética de indivíduos com uma semelhança ancestral de uma ancestralidade comum (*identity-by-descent*, IBD).

Para este objetivo, no projecto GenMoz será usada uma **estratégia de amostragem densa** que inclui todos os casos de malária (e não apenas uma seleção) em áreas de baixa transmissão na Província de Maputo. Os resultados serão comparados com uma seleção de amostras de indivíduos baseados nas unidades sanitárias do resto das províncias (Figura 2).

Conectividade entre casos detectados nas distintas províncias do país

Com as informações de quais amostras são geneticamente similares, podemos quantificar a sua conectividade regional entre províncias e o grau de importação de uma área para outra (Figura 3).

Figura 3. Conectividade genética entre províncias

Figura 4. História das viagens reportadas no sul do país

H) Brochure 8. Malaria genetic panels for monitoring and decision making.

Sistema N° 8  
Fevereiro  
2024

## Vigilância genómica da malária em Moçambique

### Painéis genéticos da malária para monitoramento de dados e tomada de decisões

Um dos objetivos do projecto GenMoz é integrar a inteligência genómica nas actividades estratégicas e operacionais do Programa Nacional do Controlo da Malária (PNCM). Este objetivo requer a transformação de dados genómicos complexos em dados agregados, tabelas e gráficos que facilitem a interpretação dos resultados para monitoramento e tomada de decisões de relevância em saúde pública. A equipa do GenMoz, em parceria com o PNCM, Malaria Consortium (MC) e Clinton Health Access Initiative (CHAI), desenvolveram um painel de visualização de dados genómicos. Numa primeira fase, o painel mostrará dados correspondentes à resistência aos medicamentos e diagnósticos.

### GenMoz

Características do painel e procedimentos

O painel está baseado no DHS2 (District Health Integration System) e anexoado ao Sistema Integrado de Informações da Malária (SIM). O processo de entrada e atualização dos dados genéticos no SIM consiste nas seguintes etapas (Fig. 1): 1) produção de dados no laboratório; 2) constituição dum banco de dados e entrada no sistema; 3) aprovação pelo PNCM do processo de entrada de dados; 4) interpretação dos resultados e seguimento. Este processo será repetido após cada entrada de dados.

Figura 1. Processo de entrada e atualização dos dados genéticos no SIM.

Figura 2. Estrutura do painel de visualização (ver Figura 4 em anexo) não corresponde aos dados reais de prevalência em Moçambique.

O painel de visualização no SIM é composto por sete gráficos de barras e três tabelas correspondentes com diferentes perfis de resistência a tratamentos contra a malária (Fig. 2). Um código de cores auxilia na interpretação: verde representa as estirpes sem mutações (sem risco), vermelho corresponde a estirpes com resistência, e azul representa estirpes com resistência a outros fármacos. Um mapa indica o número de amostras analisadas no país.

Funcionalidades e uso do painel

A capacidade de personalizar visualizações e filtrar dados por critérios específicos permite análises detalhadas e direcionadas. Por exemplo, compreender as variações da resistência aos medicamentos em diferentes níveis (nacional, regional ou provincial) ajudando identificar sinais de resistência emergentes. A variedade de gráficos (barras, pizza, rosca, linha) oferece aos usuários a flexibilidade de analisar os dados de maneiras que melhor atendam às suas necessidades, facilitando a partilha de informações entre os pesquisadores e a compreensão de tendências e padrões.

Figura 3. Ilustração das capacidades de personalização dos gráficos com dados de resistência aos TDRs - 2023

Figura 4. Processo de concepção e equipes envolvidas na elaboração do painel genético, e formações realizadas com os pontos focais da malária das províncias.

4

da Silva C, et al. BMJ Open 2024; 14:e092590. doi: 10.1136/bmjopen-2024-092590

1) Brochure 9. Pregnant women at first antenatal care visit as sentinel group.

Boletim N.º 9  
Janeiro  
2024

## Vigilância genómica da malária em Moçambique

GenMoz

### Mulheres grávidas na primeira consulta pré-natal como população sentinela

A equipa do GenMoz está a trabalhar com o Programa Nacional de Controlo da Malária de Moçambique para identificar as melhores abordagens de vigilância.

A vigilância genómica pode ajudar a produzir dados mais precisos sobre a resistência aos medicamentos antimaláricos, a importância de casos de malária ou mesmo variações na intensidade da transmissão da infeção ao longo do tempo. No entanto, as amostras para vigilância devem ser recolhidas regularmente e de forma económica. Os inquéritos de saúde baseados na comunidade ou nas unidades sanitárias - usados para estratificar os níveis de malária - poderiam ser uma fonte de dados genómicos regulares, mas essa abordagem requer recursos humanos e económicos significativos. Para abordar esta questão, GenMoz está avaliando se as informações genómicas derivadas de infeções em mulheres grávidas na primeira consulta pré-natal (CPN) são representativas das infeções que afetam toda a população em geral.

Para além da vigilância na CPN, as mulheres grávidas nas visitas de parto, também podem ser usadas para monitorar a eficácia do tratamento intermitente preventivo da malária durante a gravidez com o Fansidar (TIP-SP) <sup>1</sup>.

#### Vantagens de utilizar as gestantes como grupo sentinela

- População de fácil acesso
- Dados contínuos
- Pode capturar casos assintomáticos
- Melhora o atendimento à população de alto risco
- Abordagem potencialmente mais económica

1

**VIGILÂNCIA NA CPN**  
Representativa da comunidade

2

**VIGILÂNCIA NA MATERNIDADE**  
Monitorar a eficácia do TIP-SP

#### Usos potenciais da informação genómica da malária em mulheres grávidas para o controlo de malária em Moçambique:

- Estratificação da transmissão da malária em diferentes regiões
- Monitoramento de marcadores moleculares de resistência a medicamentos antimaláricos
- Monitoramento do impacto das intervenções em curso (medicamentosas e não medicamentosas) e tomada de decisões sobre a introdução de intervenções
- Oportunidade de medir o comportamento de procura de cuidados de saúde e cobertura das intervenções antimaláricas entre mulheres grávidas

1. Matambou et al. Journal of Infection, 2024; doi.org/10.1093/jinf/itae004

Resultados da pesquisa 2016- 2019: A composição genética das infeções por *Plasmodium falciparum* não difere entre mulheres grávidas e crianças de Maputo

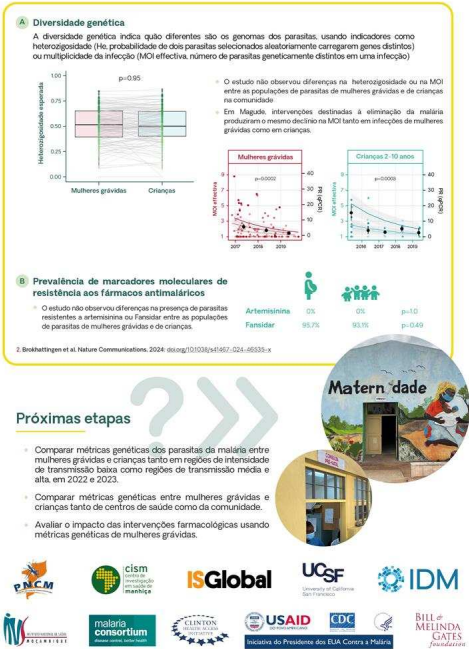

Supplement: inline-supplementary-material-1 [file inline-supplementary-material-1.pdf]
